# Supplementary material for: Evaluation of an Australian health literacy training program for socially disadvantaged adults attending basic education classes: study protocol for a cluster randomised controlled trial
Source: Springer Nature journal article supplement (doi:10.1186/s12889-016-3034-9), 2016-05-27
Supplement: MOESM1 [file 10206056]

1. What temperature is shown on thermometer 1?

\_\_\_\_\_

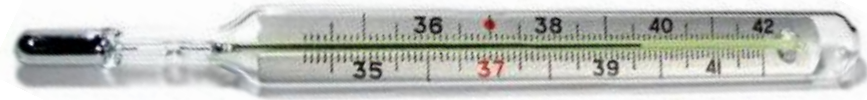

2. This morning I took my temperature with thermometer 2.

This is the reading I got. Is this ok?

No  Yes

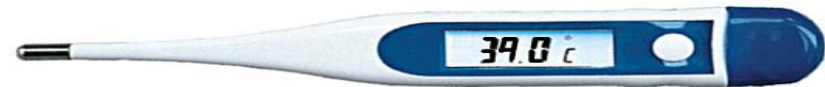

3. On thermometer 3 write what temperature you think is normal for a healthy adult.

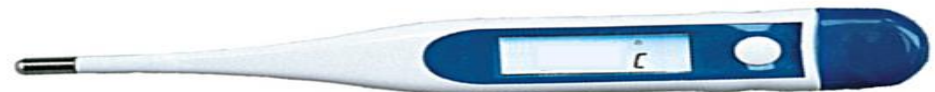

# Foody Feast

## Soup in a Mug

**Purse size  
sachets**

*Great for work. Great for play.  
Use any time of day.*

**50g  
2 Sachets**

## Potato and leek

### Ingredients

Vegetables, creamer [vegetable oil, glucose syrup, milk protein, mineral salts (339, 450)], chives, maltodextrin (from wheat), salt, flavour enhances (621, 627), wheat fibre, mineral salt (potassium chloride), vegetable oil, garlic, hydrolysed corn protein, flavours, emulsifier (471), colour, spice extract, preservative (222), food acid (citric)

### Directions

1. Empty contents of one sachet into a 300 mL mug.
2. Fill with boiling water and stir for 15-20 seconds.

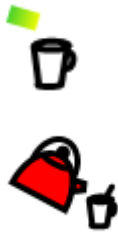

**Best Before 12/04/13**

### NUTRITION INFORMATION

Servings per package: 2  
Serving size: 300mL

|                   | Avg Qty per Serving g | Avg Qty per 100mL |
|-------------------|-----------------------|-------------------|
| Energy            | 493kJ                 | 164kJ             |
| Protein           | 2.5g                  | 0.8g              |
| <b>Fat, Total</b> | <b>2.4</b>            | <b>0.8g</b>       |
| -saturated        | 2.2g                  | 0.7g              |
| Carbohydrate      | 15.6g                 | 5.2g              |
| -sugar            | 1.2g                  | 0.4g              |
| Dietary fibre     | 1.7g                  | 0.6g              |
| Sodium            | 595m                  | 198mg             |
| Potassium         | g                     | 150mg             |
|                   | 450m                  |                   |
|                   | g                     |                   |

**Product Description: Ice cream**

**NUTRITION INFORMATION**

Servings per package: 4

Serving size: 100mL

|                   | <b>Average quantity per serving</b> |
|-------------------|-------------------------------------|
| Energy            | 1050kJ                              |
| Calories          | 250 kcal                            |
| Protein           | 4g                                  |
| Fat, total        | 13g                                 |
| - saturated       | 9g                                  |
| - monounsaturated | 0g                                  |
| - polyunsaturated | 3g                                  |
| - trans           | 1g                                  |
| Carbohydrate      | 30g                                 |
| - sugars          | 23g                                 |
| Fibre             | 0g                                  |
| Sodium            | 55mg                                |

Ingredients: Cream, Skim Milk, Sugar, Egg, Stabilisers (Guar Gum), Peanut Oil, Vanilla Extract (0.05%)
