# Supplementary material for: Evaluation of an Australian health literacy training program for socially disadvantaged adults attending basic education classes: study protocol for a cluster randomised controlled trial
Source: Springer Nature journal article supplement (doi:10.1186/s12889-016-3034-9), 2016-05-27
Supplement: MOESM3 [file 10206056]

**Additional file 3** Shared decision-making (immediate follow-up)

**Please put a cross in the box that you think has the right answer.**

| Question                                                                                                                  | Multiple choice responses<br>(correct is bold)                                                                     |
|---------------------------------------------------------------------------------------------------------------------------|--------------------------------------------------------------------------------------------------------------------|
| 1. What is <u>shared decision making</u> ?                                                                                | Doctor decides<br><b>Doctor and patient decide together</b><br>Patient decides<br>Doctor and nurse decide together |
| 2. Which word is most like the word ' <u>options</u> '?                                                                   | Advantages (something good)<br>Lists<br><b>Choices</b><br>Total<br>Treatment<br>Disadvantages or Problems          |
| 3. Which word is most like the word ' <u>benefit</u> '?                                                                   | <b>Advantages (something good)</b><br>Lists<br>Choices<br>Total<br>Treatment<br>Disadvantages or Problems          |
| 4. Which word is most like the word ' <u>harm</u> '?                                                                      | Advantages (something good)<br>Lists<br>Choices<br>Total<br>Treatment<br><b>Disadvantages or Problems</b>          |
| 5. Which of the following numbers represents the biggest risk of getting a disease?                                       | 1 in 100<br>1 in 1000<br><b>1 in 10</b>                                                                            |
| 6. Which of the following numbers represents the biggest risk of getting a disease?                                       | 1%<br><b>10%</b><br>5%                                                                                             |
| 7. If the chance of getting a disease is 20 out of 100, this would be the same as a _____% chance of getting the disease. | free response (20)                                                                                                 |

**Here is some information about a new vaccine – Vaccine X. Please read the information carefully and look at the picture.**

There is a new vaccine available, called Vaccine X. It helps to prevent Disease Y. There were some mild side effects of the vaccine, including: (1) Headaches, (2) Diarrhea, and (3) Fever.

The picture below shows how likely each of these side effects are.

Side-effects of Vaccine X

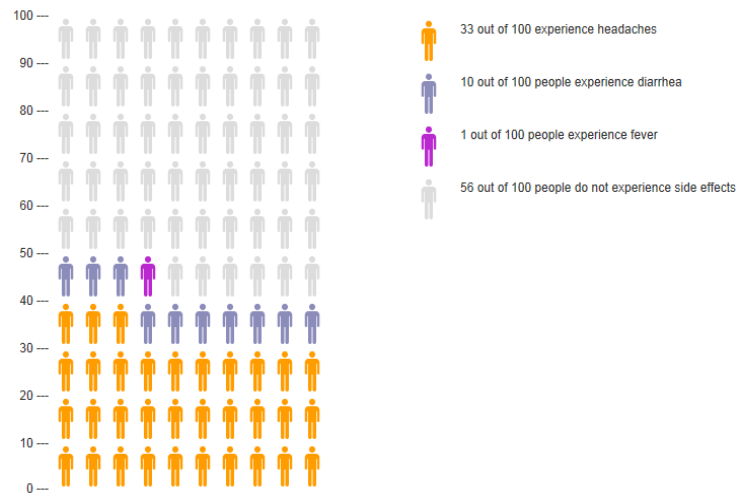

|                                                                     |                                                                                                       |
|---------------------------------------------------------------------|-------------------------------------------------------------------------------------------------------|
| 8. Which side-effect was <u>most likely</u> ?                       | <b>Headaches</b><br>Diarrhea<br>Fever                                                                 |
| 9. Which side effect was <u>least likely</u>                        | Headaches<br>Diarrhea<br><b>Fever</b>                                                                 |
| 10. People were <u>more likely</u> to:                              | Experience side-effects<br><b>Not experience side-effects</b>                                         |
| 11. Out of 100 people, how many people will have a <u>fever</u> ?   | 33<br>10<br><b>1</b><br>56                                                                            |
| 12. Out of 100 people, how many people will have <u>headaches</u> ? | <b>33</b><br>10<br>1<br>56                                                                            |
| 13. Choose one word to describe the risk of fever                   | Certain<br>Very likely<br>Likely<br><b>Possible</b><br>Unlikely<br><b>Very unlikely</b><br>Impossible |
| 14. Choose one word to describe the risk of headaches               | Certain<br>Very likely<br><b>Likely</b><br><b>Possible</b><br>Unlikely<br>Very unlikely<br>Impossible |
