# Supplementary material for: Evaluation of an Australian health literacy training program for socially disadvantaged adults attending basic education classes: study protocol for a cluster randomised controlled trial
Source: Springer Nature journal article supplement (doi:10.1186/s12889-016-3034-9), 2016-05-27
Supplement: MOESM4 [file 10206056]

**Additional file 4** 6 month knowledge measures (12 items)

**Health Quiz.** Please choose the answer that you think is the most correct.

|                                                                                                                                        |                                                                                                                                                                                                                                                                                                                                 |         |          |                    |               |               |            |          |  |
|----------------------------------------------------------------------------------------------------------------------------------------|---------------------------------------------------------------------------------------------------------------------------------------------------------------------------------------------------------------------------------------------------------------------------------------------------------------------------------|---------|----------|--------------------|---------------|---------------|------------|----------|--|
| <p>1. My pharmacist asks if I want the generic brand of my prescribed medicine. What does generic brand mean?</p>                      | <p>A different brand of your medicine that has fewer doses<br/> A different brand of your medicine that is stronger<br/> A different brand of your medicine that is weaker<br/> <b>A different brand of your medicine that has the same active ingredient and can cost less</b></p>                                             |         |          |                    |               |               |            |          |  |
| <p>2. What does PBS refer to?</p>                                                                                                      | <p>A health care professional you would go to if you wanted advice on your diet<br/> A disease that causes high levels of glucose in the blood<br/> <b>The Australian government program that helps to pay some of the cost of your medicine</b><br/> The organisation in Australia that offers free bowel cancer screening</p> |         |          |                    |               |               |            |          |  |
| <p>3. What information will you not find on a medicine label?</p>                                                                      | <p>Side-effects<br/> Ingredients<br/> <b>Contact information of your closest GP</b><br/> What age group can take the medicine</p>                                                                                                                                                                                               |         |          |                    |               |               |            |          |  |
| <p>4. In Australia, who can be helped by the PBS?</p>                                                                                  | <p>People over 55 years old only<br/> People with private health insurance only<br/> Australian residents with chronic diseases (such as cancer) only<br/> <b>Australian residents who have a Medicare card</b></p>                                                                                                             |         |          |                    |               |               |            |          |  |
| <p>5. The chances of getting side effects from Medicine X is 76%. Choose one word that describes the risk of getting side effects.</p> | <table border="0"> <tr> <td>Certain</td> <td>Unlikely</td> </tr> <tr> <td><b>Very likely</b></td> <td>Very unlikely</td> </tr> <tr> <td><b>Likely</b></td> <td>Impossible</td> </tr> <tr> <td>Possible</td> <td></td> </tr> </table>                                                                                            | Certain | Unlikely | <b>Very likely</b> | Very unlikely | <b>Likely</b> | Impossible | Possible |  |
| Certain                                                                                                                                | Unlikely                                                                                                                                                                                                                                                                                                                        |         |          |                    |               |               |            |          |  |
| <b>Very likely</b>                                                                                                                     | Very unlikely                                                                                                                                                                                                                                                                                                                   |         |          |                    |               |               |            |          |  |
| <b>Likely</b>                                                                                                                          | Impossible                                                                                                                                                                                                                                                                                                                      |         |          |                    |               |               |            |          |  |
| Possible                                                                                                                               |                                                                                                                                                                                                                                                                                                                                 |         |          |                    |               |               |            |          |  |
| <p>6. Your doctor asks you to 'wait and watch'. What does 'wait and watch' mean?</p>                                                   | <p>When you wait in the waiting room and watch TV<br/> <b>When you carefully watch your symptoms without having any treatment</b><br/> When you carefully watch your symptoms whilst you are having treatment<br/> When you wait for your test results to come back</p>                                                         |         |          |                    |               |               |            |          |  |
| <p>7. My father has diabetes and needs to be careful about what he eats. Who can help him plan his meals?</p>                          | <p>Paediatrician<br/> <b>Dietician</b><br/> Optometrist<br/> Psychologist</p>                                                                                                                                                                                                                                                   |         |          |                    |               |               |            |          |  |

## Serves quiz

Please mark true or false

- |                                                              |       |
|--------------------------------------------------------------|-------|
| 8. 1 whole watermelon = 1 serve of fruit                     | False |
| 9. 2 large eggs = 1 serve of protein                         | True  |
| 10. 2 slices of wholemeal bread = 1 serve of grain foods     | False |
| 11. 1 cup of tea with milk (but no sugar) = 1 serve of dairy | False |
| 12. ½ glass of red wine = 1 serve of fruit                   | False |
